# Supplementary material
Source: HighWire-hosted journal article supplement (https://jnm.snmjournals.org/highwire/filestream/95037/field_highwire_adjunct_files/0/180687_Supplemental_Data.pdf)
Supplement: 180687_Supplemental_Data.pdf [file 180687_Supplemental_Data.pdf]

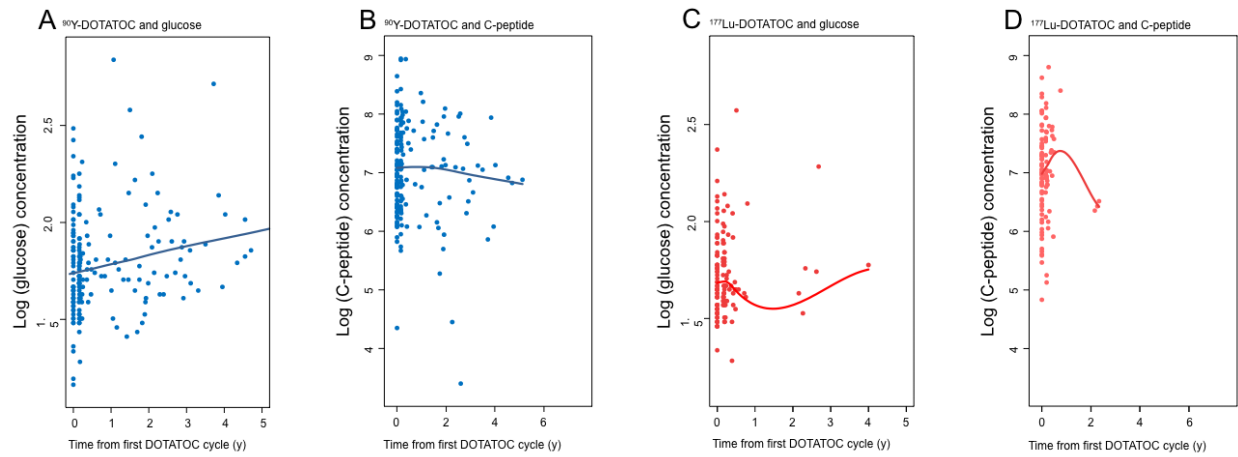

**Supplemental Figure 1.** Glucose (**A and C**) and C-peptide (**B and D**) levels after yttrium-90-DOTATOC and lutetium-177-DOTATOC.
